# Supplementary material for: Effect of chirality of l/d-proline and prochiral glycine as the linker amino acid in five-atom linked thymidinyl-(α-amino acid)-thymidine dimers
Source: Royal Society of Chemistry journal article supplement (doi:10.1039/b913546d), 2009-01-01

## Effect of chirality of L/D-proline and prochiral glycine as the linker amino acid in 5-atom linked Thymidinyl-( $\alpha$ -amino acid)-Thymidine dimers

Seema Bagmare, Moneesha D'Costa and Vaijayanti A. Kumar\*<sup>a</sup>

Mass and <sup>1</sup>H NMR for compound **Ia**

Mass and <sup>1</sup>H NMR for compound **Ib**

Mass and <sup>1</sup>H NMR for compound **Ic**

N $\leftrightarrow$ S sugar conformation preferences in **Ia**, **Ib** & **Ic**

2D-COSY <sup>1</sup>H NMR for compound **Ic**

Temperature dependent <sup>1</sup>H-NMR shift in H-6 proton of compound **Ib**

### Compound Ia Mass and $^1\text{H}$ NMR

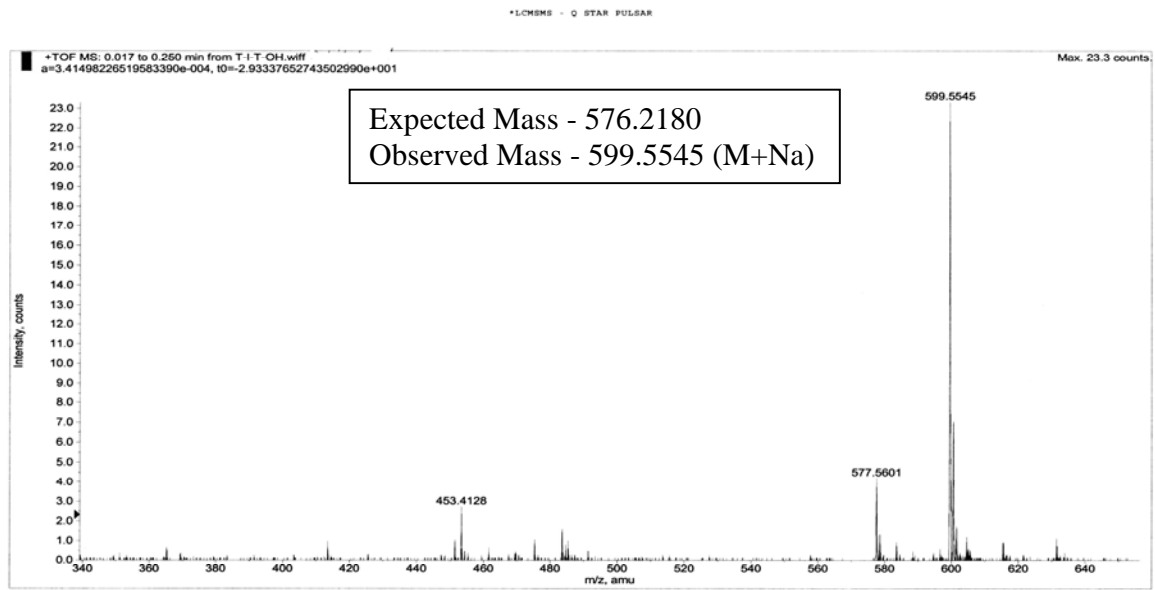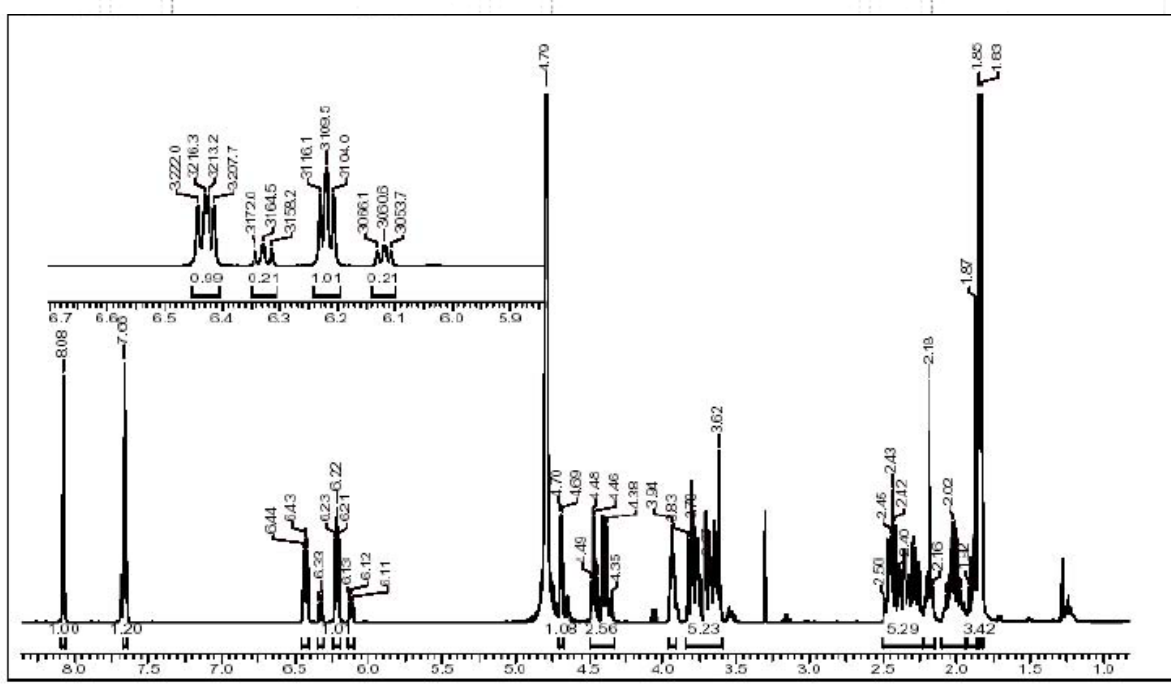

Compound **Ib** Mass and  $^1\text{H}$  NMR

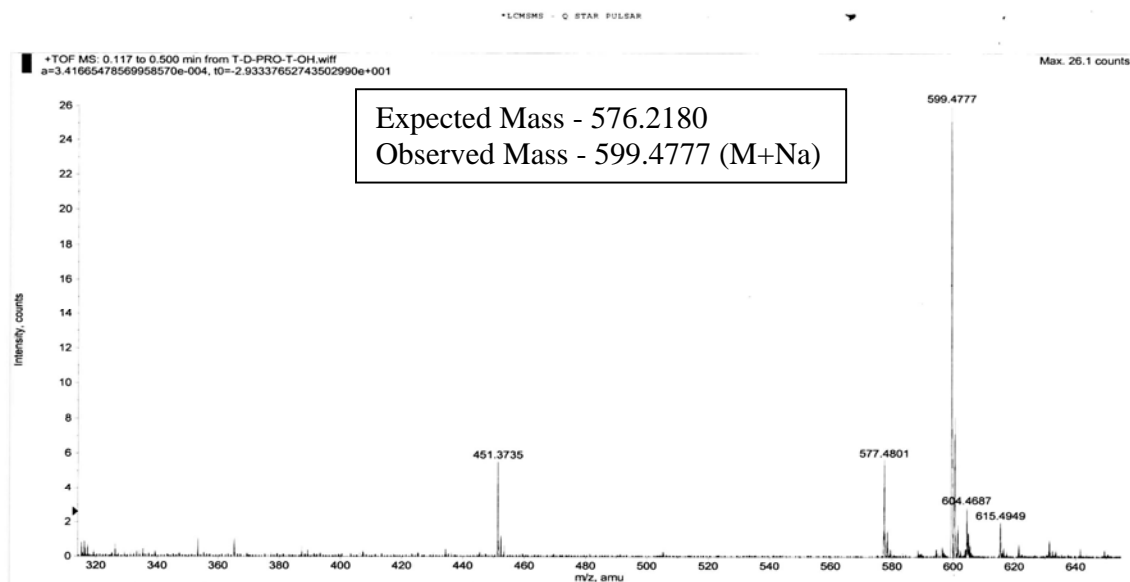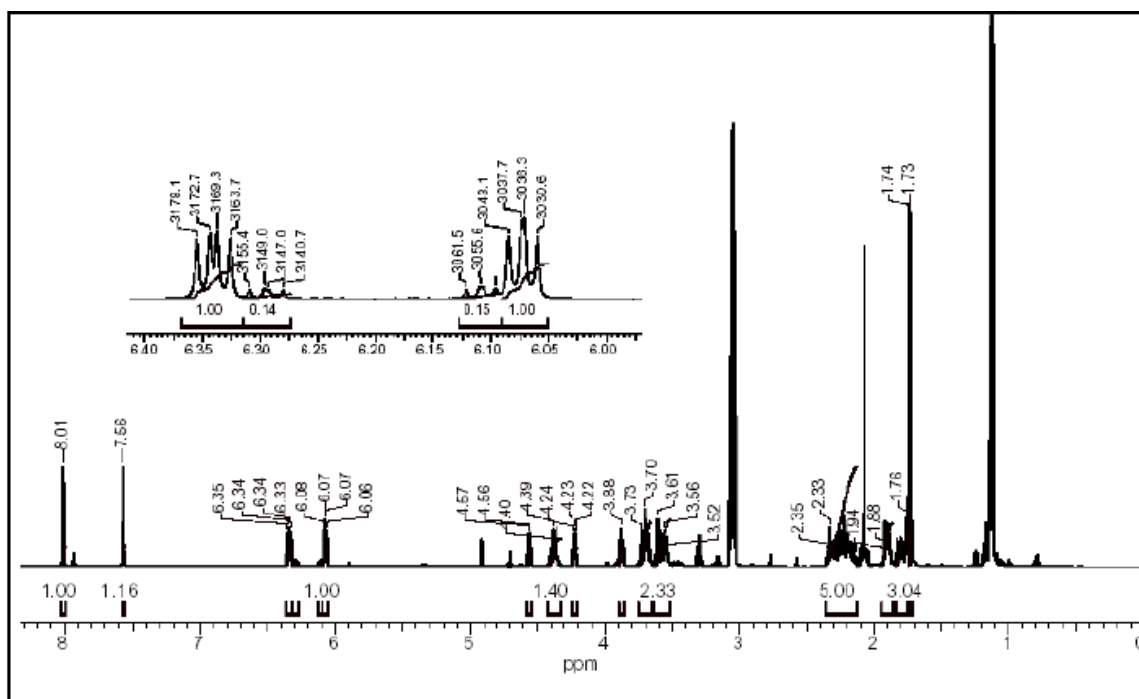

Compound **Ic** Mass and  $^1\text{H}$  NMR

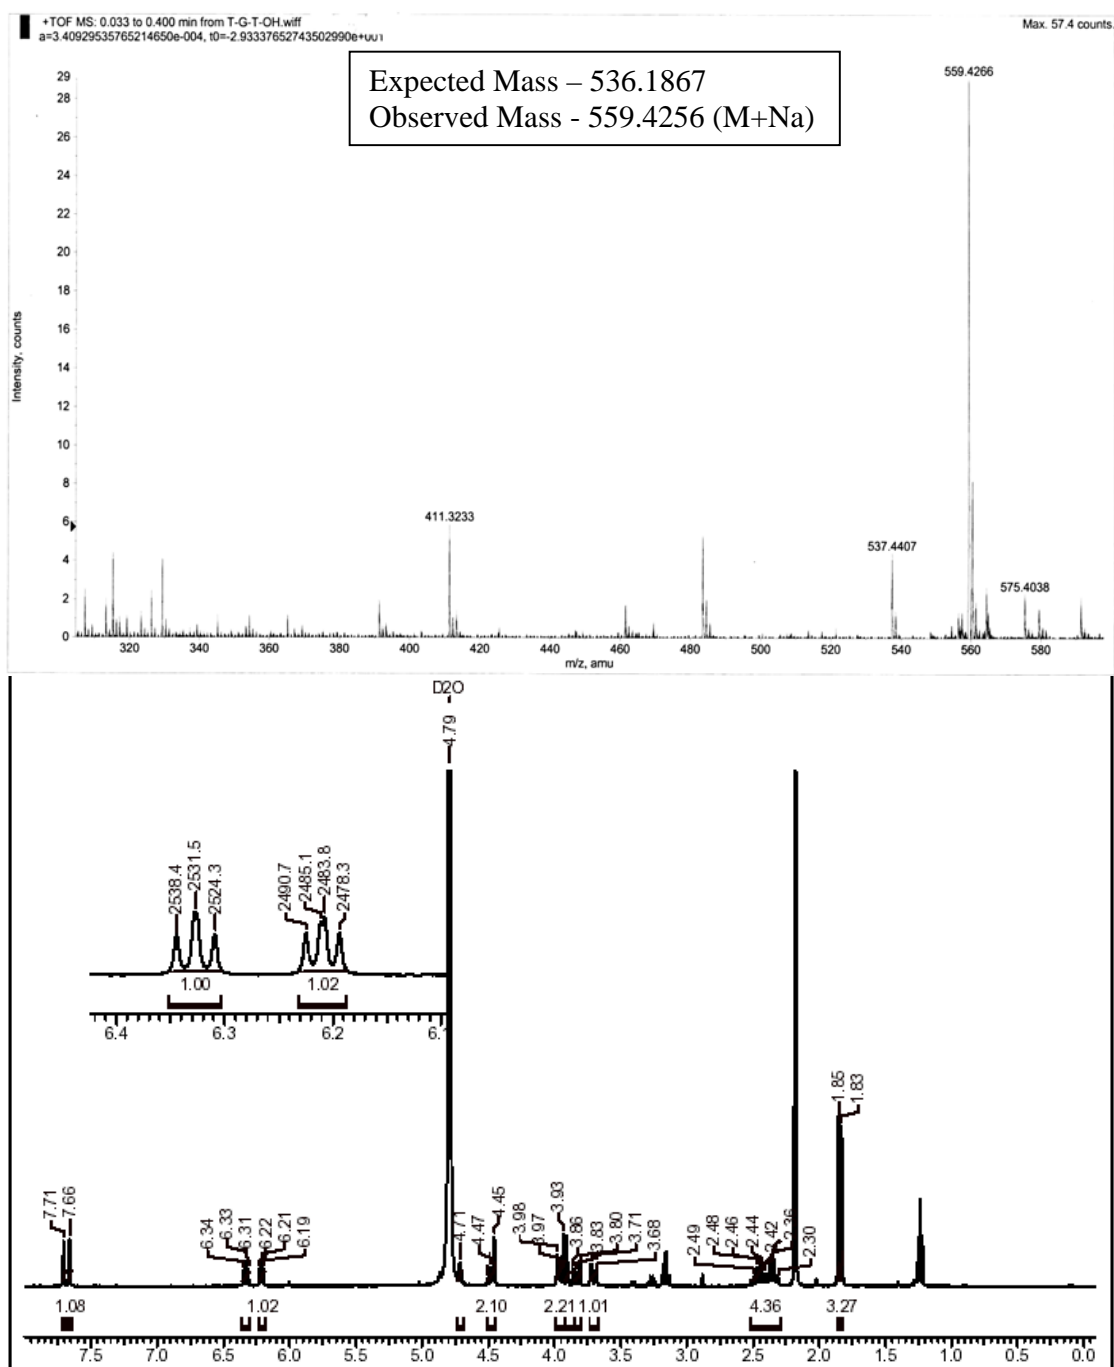

**Table 1.** N $\leftrightarrow$ S sugar conformation preferences in T-(amino acid)-T dimers **Ia**, **Ib** & **Ic**

| Compound               |        | $J_{H1',H2'}$ (Hz) | $J_{H1',H2''}$ (Hz) | %S | %N | 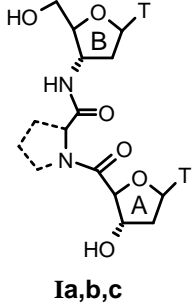 <p><b>Ia,b,c</b></p> |
|------------------------|--------|--------------------|---------------------|----|----|----------------------------------------------------------------------------------------------------------|
| <b>Ia</b> <sup>#</sup> | Ring A | 5.6                | 9.0                 | 82 | 18 |                                                                                                          |
|                        | Ring B | 5.7                | 7.1                 | 50 | 50 |                                                                                                          |
| <b>Ib</b> <sup>#</sup> | Ring A | 5.5                | 8.6                 | 72 | 28 |                                                                                                          |
|                        | Ring B | 5.5                | 6.5                 | 36 | 64 |                                                                                                          |
| <b>Ic</b> <sup>#</sup> | Ring A | 6.9                | 7.2                 | 73 | 27 |                                                                                                          |
|                        | Ring B | 5.6                | 6.8                 | 44 | 56 |                                                                                                          |

<sup>#</sup>The A- and B-ring protons were assigned based on 2D-COSY NMR experiments

Compound **Ic**: 2D-COSY  $^1\text{H}$  NMR

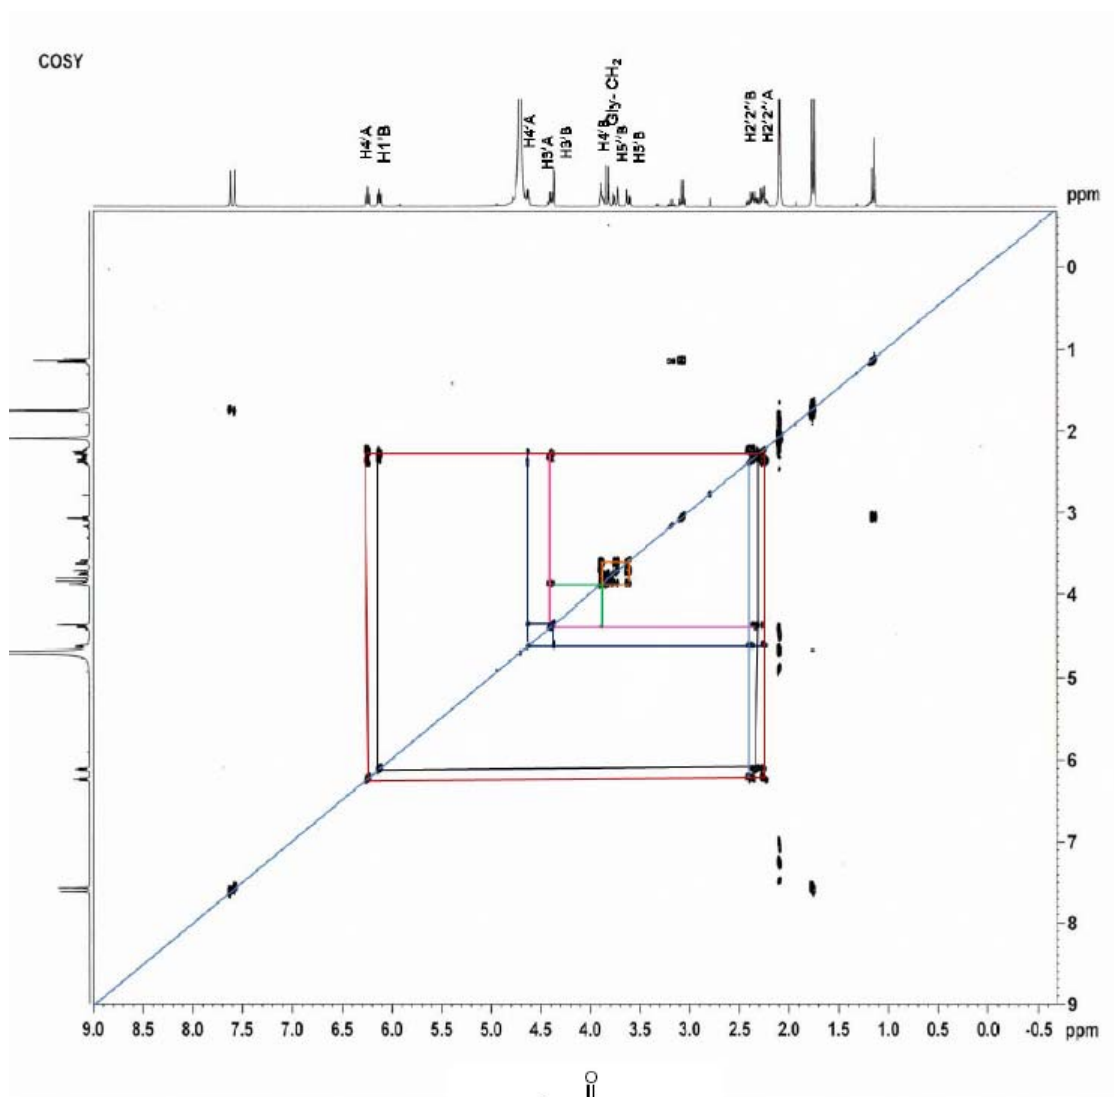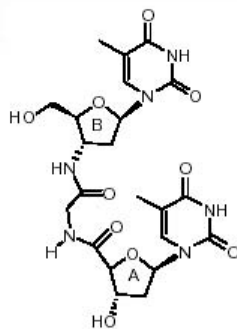

**Compound Ib:** Temperature dependent  $^1\text{H}$ -NMR shift in H-6 proton

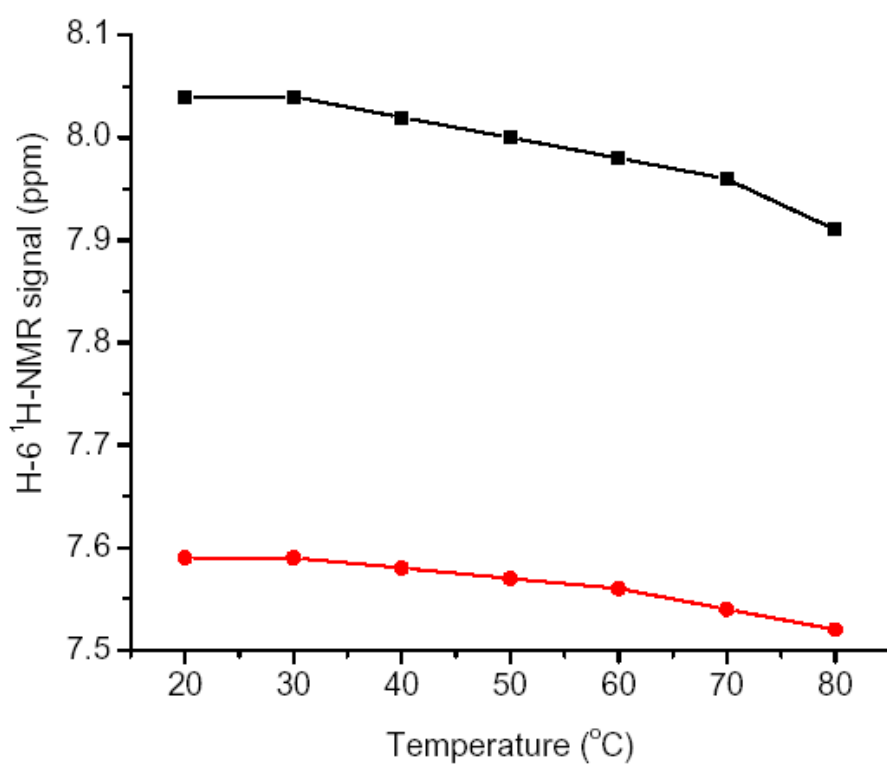

Supplement: b913546d.pdf [file b913546d.pdf]
